# Supplementary material
Source: MDPI journal article supplement (https://www.mdpi.com/2225-1154/4/4/50)
Supplement: s1 [file s1]

# Supplementary Materials: A Quasi-Global Approach to Improve Day-Time Satellite Surface Soil Moisture Anomalies through the Land Surface Temperature Input

Robert M. Parinussa, Richard A. M. de Jeu, Robin van der Schalie, Wade T. Crow, Fangni Lei and Thomas R. H. Holme

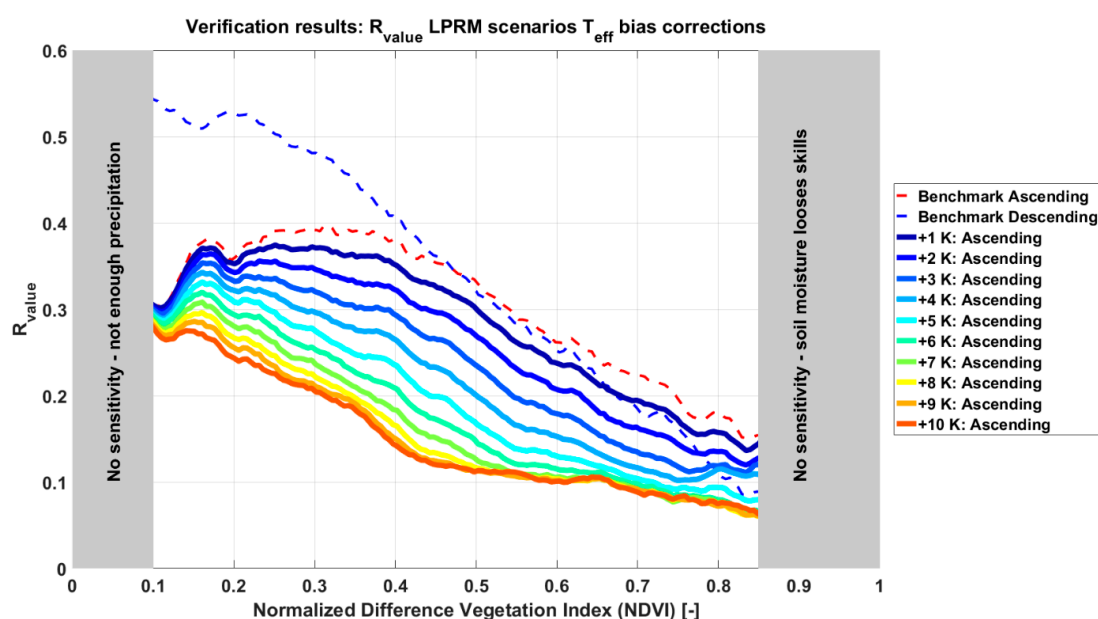

**Figure S1.** The distinct  $R_{\text{value}}$  results for the positive bias scenarios ranging from +1 to +10 degrees K as well as the benchmark products. These additive bias scenarios consistently degrade the quality of the soil moisture retrievals hence the manuscript focuses on the negative bias scenarios from Figure 2.

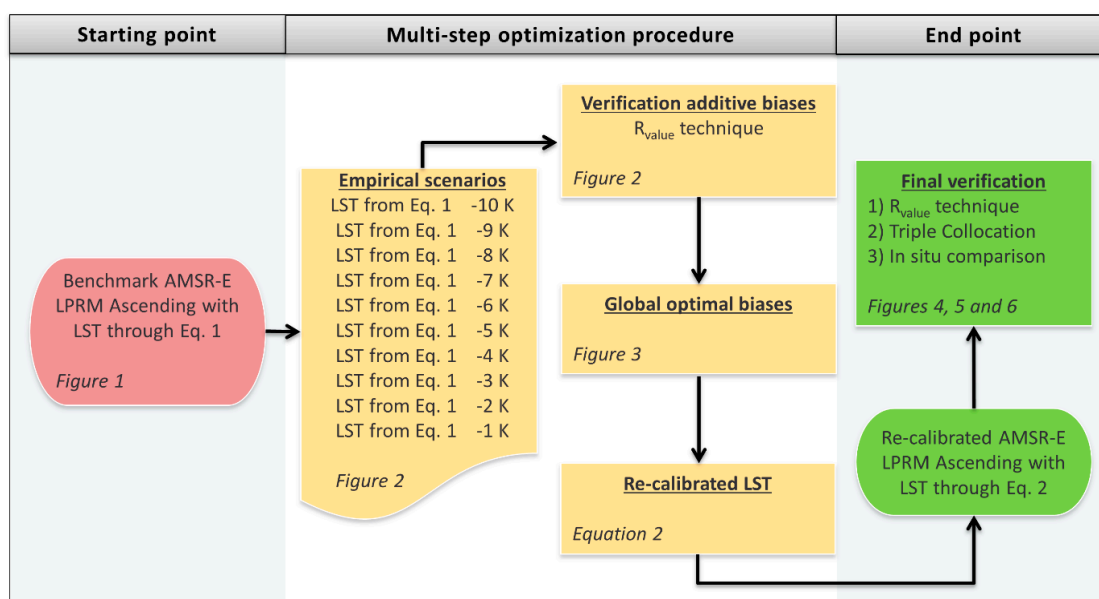

**Figure S2.** A flowchart that sequentially describes the multi-step optimization procedure. This procedure starts with the benchmark approach followed by the additive bias scenarios that were used within the LPRM with the re-calibrated LST relation.
